# Supplementary material
Source: publisher figshare collection journal article supplement (https://acs.figshare.com/ndownloader/files/25516005)
Supplement: Supplementary file 1 [file 25516005]

# Bioengineered Human Serum Albumin Fusion Protein as Target/Enzyme/pH Three-Stage Propulsive Drug Vehicle for Tumor Therapy

*Key Laboratory of Carbohydrate Chemistry and Biotechnology, Ministry of Education, School of Pharmaceutical Sciences, Jiangnan University, Wuxi 214122, China.*

[illegible]

| Component             | Volume       |
|-----------------------|--------------|
| Primers Star Max (2X) | 25 $\mu$ L   |
| Upstream primer       | 2 $\mu$ L    |
| Downstream primer     | 2 $\mu$ L    |
| Ultra-pure water      | 20.5 $\mu$ L |
| HSA Template          | 2.5 $\mu$ L  |

**Table S2.** *The condition of double enzyme digestion*

| Component         | Volume     |
|-------------------|------------|
| DNA               | 3 $\mu$ L  |
| FastDigest Buffer | 2 $\mu$ L  |
| Xho I             | 1 $\mu$ L  |
| Not I             | 1 $\mu$ L  |
| Ultra-pure water  | 13 $\mu$ L |

**Table S3.** *The condition of plasmid linkage*

| Component                          | Volume     |
|------------------------------------|------------|
| T4 ligase                          | 1 $\mu$ L  |
| FastDigest Buffer                  | 1 $\mu$ L  |
| pPICZ $\alpha$ A (after digestion) | 1 $\mu$ L  |
| DNA (after digestion)              | 1 $\mu$ L  |
| Ultra-pure water                   | 16 $\mu$ L |

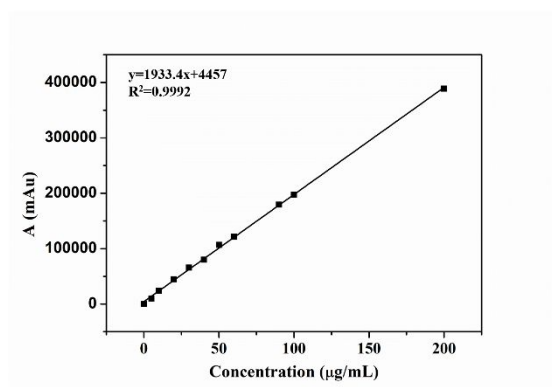

**Figure S1** The concentration-absorption curve of PTX in PBS: methanol=45:55.

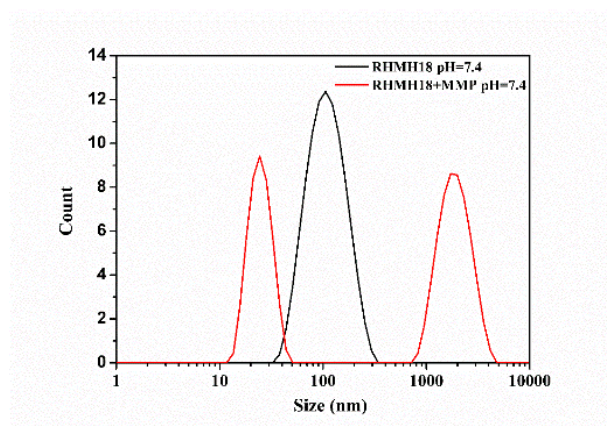

**Figure S2** Size difference of RHHM18 NPs before and after adding MMP-2 for 24 h

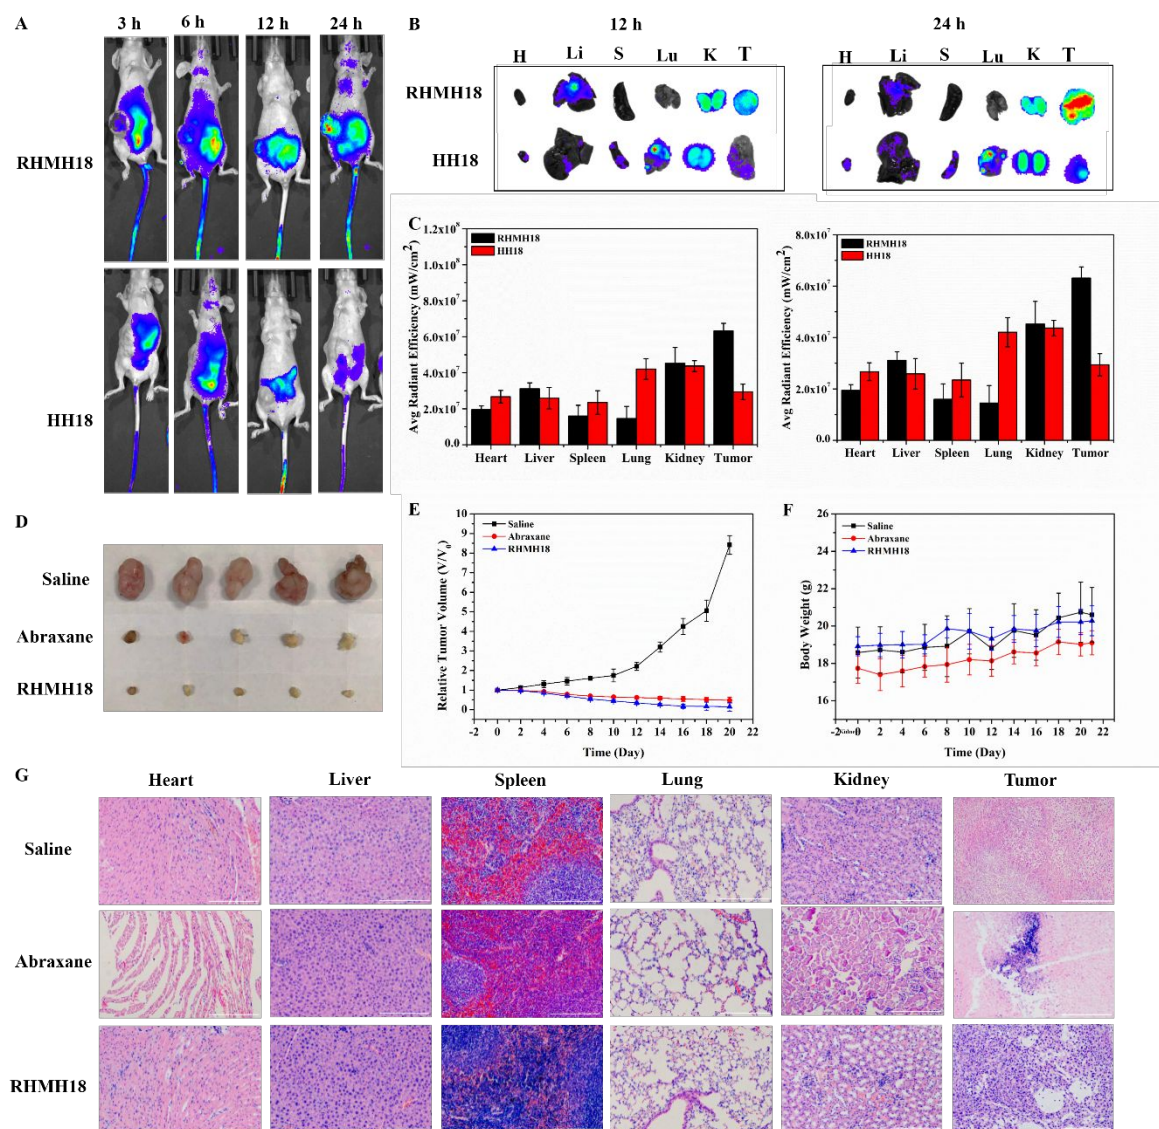

**Figure S3** (A) NIR fluorescence images of A549 tumor bearing mice after injection of fusion HSA nanomedicine at different time intervals. (B) *Ex vivo* NIR fluorescence images of major organs and tumors after different treatments at 12 h and 24 h. (C) Quantitative analysis of NIR fluorescence intensities of major organs and tumors after different treatments at 12 h and 24 h. (D) Optical images of tumor status stripped from mouse. (E) Relative volumes of tumors. (F) Body weight changes. (G) H&E images of the excised tumor and normal organs.

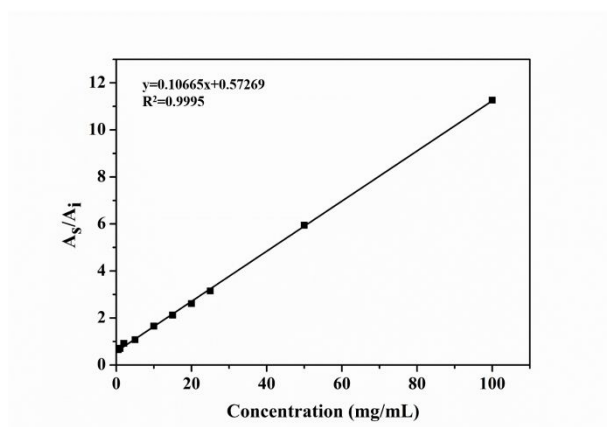

**Figure S4** Standard curve of paclitaxel concentration and peak area in plasma samples.
